# Supplementary material for: A bis-dianionic β-ketoiminato octalithium complex as a universal catalyst for hydroboration with broad scope
Source: Royal Society of Chemistry journal article supplement (doi:10.1039/d3nj03524g), 2023-01-01
Supplement: d3nj03524g1.pdf [file d3nj03524g1.pdf]

## Compound Characterisation Checklist

ORGANIC  
CHEMISTRY  
FRONTIERS

Manuscript ID: \_\_\_\_\_

Submitting Author: \_\_\_\_\_

Manuscript Title: \_\_\_\_\_

1. Characterisation of new and known compounds should be reported in line with the data requirements of the journal: <https://rsc.li/2Jdig5s>
2. For each compound, enter the compound number as per manuscript in the first column, and type a single "X" in the cell corresponding to the type of data reported in the manuscript or ESI.
3. Print the completed checklist as a ".pdf" file. During submission, upload the saved file together with your manuscript, and select "Compound Characterization Checklist" as the file designation.
4. If no synthesis is reported in the paper, please indicate this in the yellow box and upload the form as above

I confirm that no synthesis or characterisation of compounds is reported in this manuscript.

| Compound number | New | Known with reference(s) cited | Yield | Physical state/mp if cryst. Solid | IR | UV-Vis | <sup>1</sup> H NMR | <sup>13</sup> C NMR | 2D NMR | Copy of NMR spectrum in ESI | MS | HRMS | Elemental Analysis | Specific optical rotation | GC/ HPLC | Copy of chromatogram in ESI | X-ray (ORTEP and CIF in ESI) | Notes |
|-----------------|-----|-------------------------------|-------|-----------------------------------|----|--------|--------------------|---------------------|--------|-----------------------------|----|------|--------------------|---------------------------|----------|-----------------------------|------------------------------|-------|
|                 |     |                               |       |                                   |    |        |                    |                     |        |                             |    |      |                    |                           |          |                             |                              |       |
|                 |     |                               |       |                                   |    |        |                    |                     |        |                             |    |      |                    |                           |          |                             |                              |       |
|                 |     |                               |       |                                   |    |        |                    |                     |        |                             |    |      |                    |                           |          |                             |                              |       |
|                 |     |                               |       |                                   |    |        |                    |                     |        |                             |    |      |                    |                           |          |                             |                              |       |
|                 |     |                               |       |                                   |    |        |                    |                     |        |                             |    |      |                    |                           |          |                             |                              |       |
|                 |     |                               |       |                                   |    |        |                    |                     |        |                             |    |      |                    |                           |          |                             |                              |       |
|                 |     |                               |       |                                   |    |        |                    |                     |        |                             |    |      |                    |                           |          |                             |                              |       |
|                 |     |                               |       |                                   |    |        |                    |                     |        |                             |    |      |                    |                           |          |                             |                              |       |
|                 |     |                               |       |                                   |    |        |                    |                     |        |                             |    |      |                    |                           |          |                             |                              |       |
|                 |     |                               |       |                                   |    |        |                    |                     |        |                             |    |      |                    |                           |          |                             |                              |       |
|                 |     |                               |       |                                   |    |        |                    |                     |        |                             |    |      |                    |                           |          |                             |                              |       |
|                 |     |                               |       |                                   |    |        |                    |                     |        |                             |    |      |                    |                           |          |                             |                              |       |
|                 |     |                               |       |                                   |    |        |                    |                     |        |                             |    |      |                    |                           |          |                             |                              |       |
|                 |     |                               |       |                                   |    |        |                    |                     |        |                             |    |      |                    |                           |          |                             |                              |       |
|                 |     |                               |       |                                   |    |        |                    |                     |        |                             |    |      |                    |                           |          |                             |                              |       |
|                 |     |                               |       |                                   |    |        |                    |                     |        |                             |    |      |                    |                           |          |                             |                              |       |
|                 |     |                               |       |                                   |    |        |                    |                     |        |                             |    |      |                    |                           |          |                             |                              |       |
|                 |     |                               |       |                                   |    |        |                    |                     |        |                             |    |      |                    |                           |          |                             |                              |       |

| Compound number | New | Known with reference(s) cited | Yield | Physical state/mp if cryst. solid | IR | UV-Vis | 1H NMR | 13C NMR | 2D NMR | Copy of NMR spectrum in ESI | MS | HRMS | Elemental Analysis | Specific optical rotation | GC/ HPLC | Copy of chromatogram in ESI | X-ray (ORTEP and CIF in ESI) | Notes |
|-----------------|-----|-------------------------------|-------|-----------------------------------|----|--------|--------|---------|--------|-----------------------------|----|------|--------------------|---------------------------|----------|-----------------------------|------------------------------|-------|
|                 |     |                               |       |                                   |    |        |        |         |        |                             |    |      |                    |                           |          |                             |                              |       |
|                 |     |                               |       |                                   |    |        |        |         |        |                             |    |      |                    |                           |          |                             |                              |       |
|                 |     |                               |       |                                   |    |        |        |         |        |                             |    |      |                    |                           |          |                             |                              |       |
|                 |     |                               |       |                                   |    |        |        |         |        |                             |    |      |                    |                           |          |                             |                              |       |
|                 |     |                               |       |                                   |    |        |        |         |        |                             |    |      |                    |                           |          |                             |                              |       |
|                 |     |                               |       |                                   |    |        |        |         |        |                             |    |      |                    |                           |          |                             |                              |       |
|                 |     |                               |       |                                   |    |        |        |         |        |                             |    |      |                    |                           |          |                             |                              |       |
|                 |     |                               |       |                                   |    |        |        |         |        |                             |    |      |                    |                           |          |                             |                              |       |
|                 |     |                               |       |                                   |    |        |        |         |        |                             |    |      |                    |                           |          |                             |                              |       |
|                 |     |                               |       |                                   |    |        |        |         |        |                             |    |      |                    |                           |          |                             |                              |       |
|                 |     |                               |       |                                   |    |        |        |         |        |                             |    |      |                    |                           |          |                             |                              |       |
|                 |     |                               |       |                                   |    |        |        |         |        |                             |    |      |                    |                           |          |                             |                              |       |
|                 |     |                               |       |                                   |    |        |        |         |        |                             |    |      |                    |                           |          |                             |                              |       |
|                 |     |                               |       |                                   |    |        |        |         |        |                             |    |      |                    |                           |          |                             |                              |       |
|                 |     |                               |       |                                   |    |        |        |         |        |                             |    |      |                    |                           |          |                             |                              |       |
|                 |     |                               |       |                                   |    |        |        |         |        |                             |    |      |                    |                           |          |                             |                              |       |
|                 |     |                               |       |                                   |    |        |        |         |        |                             |    |      |                    |                           |          |                             |                              |       |
|                 |     |                               |       |                                   |    |        |        |         |        |                             |    |      |                    |                           |          |                             |                              |       |
|                 |     |                               |       |                                   |    |        |        |         |        |                             |    |      |                    |                           |          |                             |                              |       |
|                 |     |                               |       |                                   |    |        |        |         |        |                             |    |      |                    |                           |          |                             |                              |       |
|                 |     |                               |       |                                   |    |        |        |         |        |                             |    |      |                    |                           |          |                             |                              |       |
|                 |     |                               |       |                                   |    |        |        |         |        |                             |    |      |                    |                           |          |                             |                              |       |
|                 |     |                               |       |                                   |    |        |        |         |        |                             |    |      |                    |                           |          |                             |                              |       |
|                 |     |                               |       |                                   |    |        |        |         |        |                             |    |      |                    |                           |          |                             |                              |       |
|                 |     |                               |       |                                   |    |        |        |         |        |                             |    |      |                    |                           |          |                             |                              |       |
|                 |     |                               |       |                                   |    |        |        |         |        |                             |    |      |                    |                           |          |                             |                              |       |
|                 |     |                               |       |                                   |    |        |        |         |        |                             |    |      |                    |                           |          |                             |                              |       |
|                 |     |                               |       |                                   |    |        |        |         |        |                             |    |      |                    |                           |          |                             |                              |       |
|                 |     |                               |       |                                   |    |        |        |         |        |                             |    |      |                    |                           |          |                             |                              |       |
|                 |     |                               |       |                                   |    |        |        |         |        |                             |    |      |                    |                           |          |                             |                              |       |
|                 |     |                               |       |                                   |    |        |        |         |        |                             |    |      |                    |                           |          |                             |                              |       |
|                 |     |                               |       |                                   |    |        |        |         |        |                             |    |      |                    |                           |          |                             |                              |       |
